# Supplementary material
Source: PubMed Central journal article supplement (PMC8051503)
Supplement: 3400_materials.pdf [file 3400_materials.pdf]

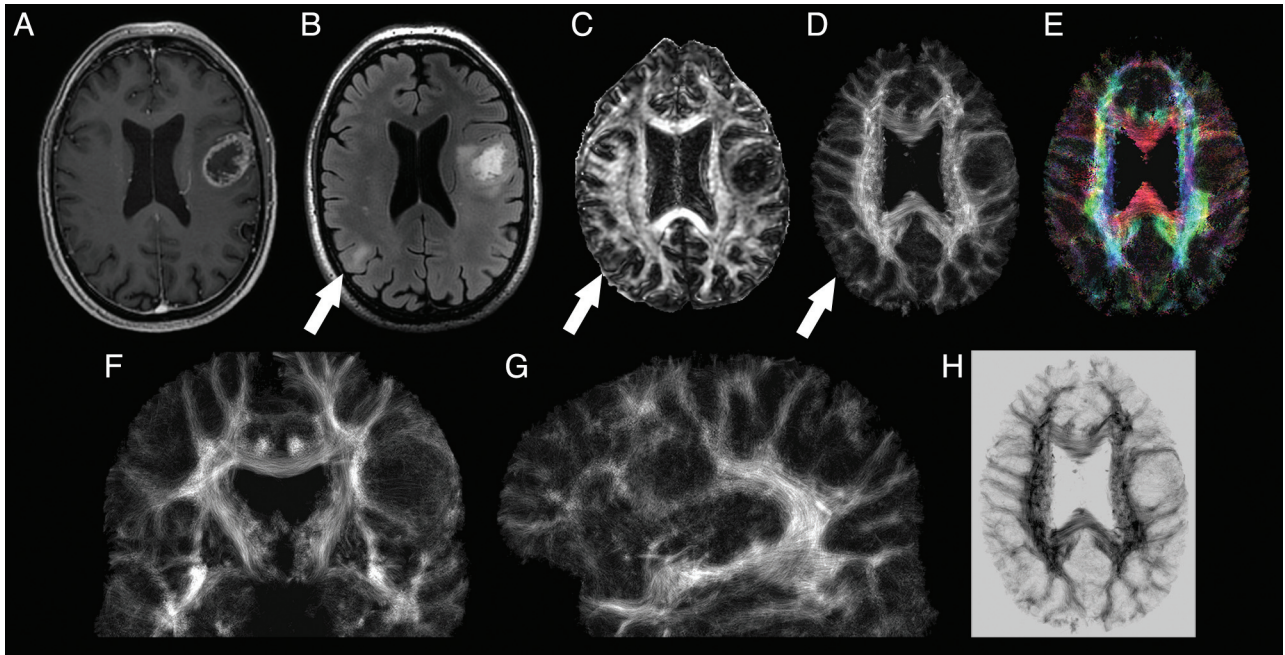

**ON-LINE FIG. 1.** Track density and FA values differ between regions of tumor and normal-appearing white matter. A, Contrast-enhanced T1-spoiled gradient-recalled and (B) FLAIR images coregistered with (C) fractional anisotropy maps (2.0-mm reconstruction) and (D) track density map (0.25-mm reconstruction) from patient 17 demonstrate an example of the cohortwide findings of significantly elevated track density values within the genu (track density, 30.22) and splenium of the corpus callosum (track density, 22.04) compared with the centrum semiovale (track density, 19.07;  $P < .01$ ). FA values were significantly elevated within the genu (FA, 0.254) and splenium of the corpus callosum (FA, 0.256) compared with the centrum semiovale (FA, 0.113;  $P < .01$ ). No statistically significant difference was observed between genu and splenium FA values, suggesting that TDI provides improved spatial resolution and tissue contrast of white matter structures compared with FA maps. Note that (E) track density directionally encoded color map (1 million tracks and 0.25-mm isotropic grid; color coding indicates local orientation of the streamlines, *blue*: cranial to caudal, *red*: right to left, *green*: anterior to posterior), (F) coronal track density image, (G) sagittal track density image, and (H) inverse white-on-black axial track density image demonstrate linear architecture within the centrally necrotic region of the tumor that is not appreciated on the FA map. In addition, a separate focus of NE T2 FLAIR hyperintensity within the contralateral right parietal lobe (*arrow*) demonstrates altered track density characteristics not definitively appreciated on the FA map. This site was later noted to demonstrate MR imaging characteristics consistent with a metastatic focus of GBM.

**On-line Table 1: Patient cohort demographics and diffusion-weighted MR imaging values**

| Patient No./Sex | Biopsy | Tumor Region | Tumor TD    | WM TD       | rTD         | Tumor ADC | WM ADC    | rADC        | Tumor FA      | WM FA         | rFA         |
|-----------------|--------|--------------|-------------|-------------|-------------|-----------|-----------|-------------|---------------|---------------|-------------|
| 1/M             | 1      | CN           | 3.07        | 2.07        | 1.48        | 892       | 639       | 1.40        | 0.013         | 0.013         | 1.00        |
|                 | 2      | CN           | 4.21        | 2.07        | 2.03        | 987       | 672       | 1.47        | 0.012         | 0.021         | 0.55        |
|                 | 3      | CN           | 1.8         | 2.07        | 0.87        | 734       | 612       | 1.20        | 0.011         | 0.037         | 0.29        |
|                 | 4      | CE           | 2.51        | 2.07        | 1.21        | 935       | 639       | 1.46        | 0.017         | 0.013         | 1.31        |
| 2/M             | 5      | CN           | 5.7         | 1.7         | 3.35        | 1117      | 619       | 1.80        | 0.013         | 0.032         | 0.41        |
|                 | 6      | CN           | 9.24        | 1.7         | 5.44        | 727       | 650       | 1.12        | 0.027         | 0.032         | 0.83        |
| 3/M             | 7      | NE           | 8.49        | 2.34        | 3.63        | 588       | 594       | 0.99        | 0.020         | 0.019         | 1.09        |
|                 | 8      | NE           | 8.56        | 2.34        | 3.66        | 575       | 554       | 1.04        | 0.014         | 0.015         | 0.94        |
| 4/M             | 9      | NE           | 2.04        | 2.47        | 0.83        | 735       | 716       | 1.03        | 0.017         | 0.037         | 0.46        |
|                 | 10     | NE           | 3.46        | 2.47        | 1.40        | 916       | 716       | 1.28        | 0.015         | 0.037         | 0.40        |
| 5/M             | 11     | CE           | 2.02        | 1.15        | 1.76        | 1321      | 632       | 2.09        | 0.020         | 0.035         | 0.56        |
|                 | 12     | CE           | 1.58        | 1.15        | 1.37        | 1298      | 612       | 2.12        | 0.016         | 0.032         | 0.51        |
| 6/M             | 13     | CE           | 5.59        | 1.55        | 3.61        | 916       | 556       | 1.65        | 0.016         | 0.043         | 0.38        |
|                 | 14     | CE           | 3.73        | 1.55        | 2.41        | 984       | 614       | 1.60        | 0.015         | 0.053         | 0.28        |
| 7/F             | 15     | NE           | 3.96        | 1.91        | 2.07        | 571       | 595       | 0.96        | 0.012         | 0.018         | 0.66        |
|                 | 16     | CE           | 6.84        | 4.3         | 1.59        | 676       | 698       | 0.97        | 0.017         | 0.013         | 1.33        |
|                 | 17     | NE           | 5.21        | 3.78        | 1.38        | 1321      | 694       | 1.90        | 0.015         | 0.019         | 0.77        |
|                 | 18     | CE           | 8.03        | 18.49       | 0.43        | 1022      | 635       | 1.61        | 0.011         | 0.016         | 0.65        |
| 8/M             | 19     | NE           | 14.85       | 22.6        | 0.66        | 655       | 550       | 1.19        | 0.016         | 0.017         | 0.96        |
|                 | 20     | CE           | 8.1         | 6.19        | 1.31        | 554       | 732       | 0.76        | 0.014         | 0.019         | 0.72        |
| 9/F             | 21     | CE           | 3.09        | 2.99        | 1.03        | 1193      | 778       | 1.53        | 0.102         | 0.157         | 0.65        |
|                 | 22     | CE           | 2.13        | 2.99        | 0.71        | 1192      | 777       | 1.53        | 0.109         | 0.154         | 0.71        |
|                 | 23     | CE           | 2.98        | 2.99        | 1.00        | 732       | 877       | 0.83        | 0.128         | 0.162         | 0.79        |
| 10/M            | 24     | NE           | 7.26        | 8.35        | 0.87        | 692       | 465       | 1.49        | 0.069         | 0.053         | 1.29        |
|                 | 25     | CE           | 3.81        | 23.5        | 0.16        | 490       | 517       | 0.95        | 0.053         | 0.049         | 1.08        |
|                 | 26     | CE           | 16.13       | 24.11       | 0.67        | 630       | 459       | 1.37        | 0.045         | 0.036         | 1.27        |
|                 | 27     | CE           | 5.11        | 2.76        | 1.85        | 493       | 517       | 0.95        | 0.025         | 0.049         | 0.50        |
| 11/F            | 28     | NE           | 4.12        | 1.88        | 2.19        | 1051      | 876       | 1.20        | 0.045         | 0.033         | 1.36        |
|                 | 29     | NE           | 3.64        | 2.16        | 1.69        | 1186      | 876       | 1.35        | 0.042         | 0.033         | 1.26        |
| 12/M            | 30     | NE           | 1.13        | 1.16        | 0.97        | 926       | 452       | 2.05        | 0.029         | 0.013         | 0.23        |
|                 | 31     | CE           | 1.6         | 1.2         | 1.33        | 505       | 532       | 0.95        | 0.038         | 0.025         | 1.53        |
| 13/F            | 32     | CN           | 1.58        | 1.15        | 1.37        | 1082      | 439       | 2.46        | 0.021         | 0.035         | 0.61        |
|                 | 33     | CE           | 4.65        | 4.53        | 1.03        | 448       | 439       | 1.02        | 0.036         | 0.035         | 1.05        |
| 14/F            | 34     | CE           | 0.23        | 1.46        | 0.16        | 613       | 606       | 1.01        | 0.053         | 0.049         | 1.09        |
| 15/M            | 35     | CE           | 0.18        | 1.23        | 0.15        | 665       | 614       | 1.08        | 0.036         | 0.029         | 1.21        |
|                 | 36     | CE           | 0.11        | 3.05        | 0.04        | 555       | 630       | 0.88        | 0.040         | 0.032         | 1.27        |
|                 | 37     | CE           | 2.68        | 2.28        | 1.18        | 1187      | 471       | 2.52        | 0.039         | 0.040         | 0.96        |
| 16/M            | 38     | CE           | 4.44        | 1.3         | 3.42        | 583       | 648       | 0.90        | 0.021         | 0.025         | 0.84        |
|                 | 39     | NE           | 4.53        | 2.44        | 1.86        | 469       | 467       | 1.00        | 0.039         | 0.090         | 0.43        |
| 17/M            | 40     | CE           | 3.65        | 1.43        | 2.55        | 427       | 593       | 0.72        | 0.108         | 0.075         | 1.43        |
|                 | 41     | CN           | 2.29        | 3.82        | 0.60        | 855       | 207       | 4.13        | 0.018         | 0.096         | 0.19        |
| 18/M            | 42     | CE           | 1.25        | 3.92        | 0.32        | 643       | 683       | 0.94        | 0.036         | 0.029         | 1.25        |
|                 | 43     | CE           | 1.4         | 2.67        | 0.52        | 1031      | 583       | 1.77        | 0.023         | 0.036         | 0.63        |
| Mean (SD)       |        |              | 4.35 (3.35) | 4.36 (5.98) | 1.54 (1.15) | 818 (268) | 610 (129) | 1.40 (0.62) | 0.034 (0.029) | 0.046 (0.029) | 0.83 (0.37) |

**Note:**—All data are presented as mean (SD) values.

M indicates male; F, female; CN, centrally necrotic region; TD, track density value; ADC, apparent diffusion coefficient value expressed as  $\times 10^{-6}$  mm<sup>2</sup>/s; rTD, relative track density value.

**On-Line Table 2: Comparison of track density imaging characteristics based on CE morphologic features of tumor tissue specimens**

|                | Track Density | Relative Track Density |                | Track Density | Relative Track Density |                | Track Density | Relative Track Density |
|----------------|---------------|------------------------|----------------|---------------|------------------------|----------------|---------------|------------------------|
| CN             | 3.98 (2.74)   | 2.16 (1.70)            | CN             | 3.98 (2.74)   | 2.16 (1.70)            | CE             | 3.97 (3.53)   | 1.27 (0.95)            |
| CE             | 3.97 (3.53)   | 1.27 (0.95)            | NE             | 5.32 (3.72)   | 1.71 (1.08)            | NE             | 5.32 (3.72)   | 1.71 (1.08)            |
| <i>P</i> value | .99           | .23                    | <i>P</i> value | .38           | .54                    | <i>P</i> value | .31           | .25                    |

**Note:**—MR imaging values are presented as mean (SD). CN indicates centrally necrotic.  
*P* value <.05 is considered statistically significant.

**On-Line Table 3: Comparison of cellular immunohistochemical characteristics based on CE morphologic features of tumor tissue specimens**

|                |             |             |              |             |               |
|----------------|-------------|-------------|--------------|-------------|---------------|
|                | Tumor       | Hypoxia     | Infiltration | Hyperplasia | Proliferation |
| CN             | 1.71 (0.91) | 1.33 (0.98) | 1.42 (1.51)  | 0.71 (0.91) | 15.4 (9.59)   |
| NE             | 1.91 (0.99) | 0.27 (1.14) | 1.25 (0.91)  | 0.79 (0.66) | 10.87 (8.18)  |
| <i>P</i> value | .66         | .16         | .72          | .85         | .32           |
|                | Tumor       | Hypoxia     | Infiltration | Hyperplasia | Proliferation |
| CN             | 1.71 (0.91) | 1.33 (0.98) | 1.42 (1.51)  | 0.71 (0.91) | 15.4 (9.59)   |
| CE             | 1.73 (1.01) | 1.46 (1.10) | 0.82 (1.24)  | 1.13 (0.80) | 15.6 (13.9)   |
| <i>P</i> value | .97         | .48         | .95          | .31         | .97           |
|                | Tumor       | Hypoxia     | Infiltration | Hyperplasia | Proliferation |
| NE             | 1.91 (0.99) | 0.27 (1.14) | 1.25 (0.91)  | 0.79 (0.66) | 10.87 (8.18)  |
| CE             | 1.73 (1.01) | 1.46 (1.10) | 0.82 (1.24)  | 1.13 (0.80) | 15.6 (13.9)   |
| <i>P</i> value | .60         | .19         | .61          | .19         | .21           |

**Note:**—Histopathologic values are presented as mean (SD). CN indicates centrally necrotic.  
*P* value <.05 is considered statistically significant.
